# Supplementary material for: PDMS-Encapsulated MXene@Polyester Fabric Strain Sensor for Multifunctional Sensing Applications
Source: MDPI journal article supplement (doi:10.3390/nano12050871), 2022-03-05
Supplement: s1 [file s1]

## Supplementary Materials

# PDMS-Encapsulated MXene@Polyester Fabric Strain Sensor for Multifunctional Sensing Applications

Wengang Lu <sup>1,†</sup>, Beenish Mustafa <sup>1,†</sup>, Zhiyuan Wang <sup>1</sup>, Fuzhuo Lian <sup>1</sup> and Geliang Yu <sup>1,2,\*</sup>

<sup>1</sup> National Laboratory of Solid State Microstructures and School of Physics, Nanjing University, Nanjing 210093, China; wengang.lu@foxmail.com (W.L.); dg1822501@smail.nju.edu.cn (B.M.); wzy10575@163.com (Z.W.); 15850786328@163.com (F.L.)

<sup>2</sup> Collaborative Innovation Centre of Advanced Microstructures, Nanjing University, Nanjing 210093, China

\* Correspondence: yugeliang@163.com

<sup>†</sup> These authors contributed equally to this work.

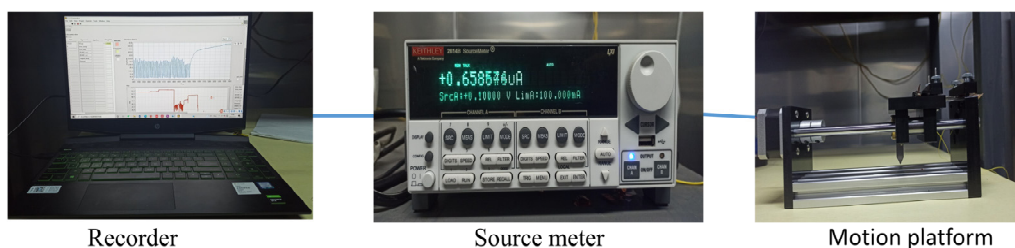

**Figure S1:** The measurement setup for the PMPF strain sensor

**Table S1.** The comparison of performance parameters between our strain sensors with other reported fabric-based strain sensors

| Sensor composition             | Fabrication methods                    | Strain range | Max Gauge Factor | Refs.        |
|--------------------------------|----------------------------------------|--------------|------------------|--------------|
| PU/CNT@Fe2+ Fibers             | patterning<br>impregnation<br>method   | 50%          | 36               | [1]          |
| RGO/AgNW/Fabric                | Cold spraying method                   | 160%         | -0.56            | [2]          |
| Graphene-based Fiber           | Dipping                                | 100%         | 10               | [3]          |
| Graphene/Polyimide Fabric      | a UV laser direct writing<br>technique | 4%           | 27               | [4]          |
| Graphene/Polyester             | Dipping                                | 15%          | -26              | [5]          |
| Graphene/Cotton<br>Fabric/Pdms | Dipping                                | 75%          | 2.49             | [6]          |
| Graphene/Silk fabric           | Hot press method                       | 10%          | 124.5            | [7]          |
| MXene/Nylon Fabric             | Dipping                                | 20%          | 24.35            | [8]          |
| MXene/Polyester/Pva            | Layer-by-layer self-assembly           | 50%          | 288.43           | [9]          |
| MXene/Cotton Fabric            | Dipping                                | 15%          | 4.11             | [10]         |
| MXene/Polyester/Pdms           | Dipping                                | 8%           | 61.2             | This<br>work |

**References:**

1. Zhang, Z.; Cheng, N.; Zhang, L.; Liu, L. ; Zhao, J.; Yu, H. Wearable strain sensor based on highly conductive carbon nanotubes polyurethane composite fibers. *Nanotechnology*. 2020, 123803.R1, doi: 10.1088/1361-6528/ab6fdd.
2. Kim, T.; Park, C.; Samuel, E.P.; An, S.; Aldalbahi, A.; Alotaibi, F.; Yarin, A.L.; Yoon, S.S. Supersonically Sprayed Washable, Wearable, Stretchable, Hydrophobic, and Antibacterial rGO/AgNW Fabric for Multifunctional Sensors and Supercapacitors. *ACS Appl. Mater. Interfaces* 2021, 13, 10013–10025, doi:10.1021/acsami.0c21372.
3. Cheng, Y.; Wang, R.; Sun, J.; Gao, L. A Stretchable and Highly Sensitive Graphene-Based Fiber for Sensing Tensile Strain, Bending, and Torsion. *Adv. Mater.* 2015, 27, 7365–7371, doi:10.1002/adma.201503558.
4. Park, J.J.; Hyun, W.J.; Mun, S.C.; Park, Y.T.; Park, O.O. Highly stretchable and wearable graphene strain sensors with controllable sensitivity for human motion monitoring. *ACS Appl. Mater. Interfaces* 2015, 7, 6317–6324, doi:10.1021/acsami.5b00695.
5. Yang, Z.; Pang, Y.; Han, X.L.; Yang, Y.; Yang, Y.; Ling, J.; Jian, M.; Zhang, Y.; Ren, T.L. Graphene Textile Strain Sensor with Negative Resistance Variation for Human Motion

Detection. *ACS Nano* 2018, 12, 9134–9141, doi:10.1021/acsnano.8b03391.

6. Zheng, Y.; Li, Y.; Zhou, Y.; Dai, K.; Zheng, G.; Zhang, B.; Liu, C.; Shen, C. High-Performance Wearable Strain Sensor Based on Graphene/Cotton Fabric with High Durability and Low Detection Limit. *ACS Appl. Mater. Interfaces* 2020, 12, 1474–1485, doi:10.1021/acsami.9b17173.
7. Wang, S.; Ning, H.; Hu, N.; Liu, Y.; Liu, F.; Zou, R.; Huang, K.; Wu, X.; Weng, S.; Alamusi. Environmentally-Friendly and Multifunctional Graphene-Silk Fabric Strain Sensor for Human-Motion Detection. *Adv. Mater. Interfaces* 2020, 7, 1–8, doi:10.1002/admi.201901507.
8. Yuan, L.; Zhang, M.; Zhao, T.; Li, T.; Zhang, H.; Chen, L.; Zhang, J. Flexible and breathable strain sensor with high performance based on MXene/nylon fabric network. *Sensors Actuators, A Phys.* 2020, 315, 112192, doi:10.1016/j.sna.2020.112192.
9. Yu, Q.; Jiang, J.; Su, C.; Huang, Y.; Chen, N.; Shao, H.  $\text{Ti}_3\text{C}_2\text{T}_x$  MXene/polyvinyl alcohol decorated polyester warp knitting fabric for flexible wearable strain sensors. *Text. Res. J.* 2021, doi:10.1177/00405175211044163.
10. Liu, L.; Wang, L.; Liu, X.; Yuan, W.; Yuan, M.; Xia, Q.; Hu, Q.; Zhou, A. High-Performance wearable strain sensor based on MXene@Cotton Fabric with network structure. *Nanomaterials* 2021, 11, doi:10.3390/nano11040889.
